# Supplementary material for: Estimation of NO x and SO 2 Emissions from Sarnia, Ontario using Mobile-MAX-DOAS and a NO x -Analyzer
Source: Copernicus journal article supplement (doi:10.5194/acp-2019-442), 2019-06-03
Supplement: Supplementary file [file acp-2019-442-AC2-supplement.pdf]

Response to Referee 2

### Anonymous Referee #2

The authors describe a spectroscopic technique (DOAS) for measuring emissions of NO<sub>x</sub> and SO<sub>2</sub> using a mobile monitoring platform. Compared to satellite-based techniques, the method used here has advantages including higher spatial resolution and the possibility of making multiple measurements per day. The mobile DOAS technique is used to measure NO<sub>x</sub> and SO<sub>2</sub> emissions from industrial sources in Sarnia, which is in southwestern Ontario close to the US border. An interesting feature of this work is the use of a NO<sub>x</sub> analyzer which provided measured NO<sub>x</sub>/NO<sub>2</sub> ratios, facilitating the estimation of NO<sub>x</sub> emissions from NO<sub>2</sub> column measurements.

The authors should address the following questions before the manuscript is published in ACP.

Response: We thank Reviewer # 2 for their time.

Line 332: The Leighton ratio is calculated using measured NO and NO<sub>2</sub> concentrations, but the NO<sub>2</sub> measurement is likely to be biased high because of other nitrogen containing pollutants such as peroxyacetyl nitrate, other organic nitrates, and nitrogen containing acids that are included in the total NO<sub>x</sub> (and therefore also in the inferred NO<sub>2</sub>) concentration measurements. The authors conclude Leighton ratios provide evidence of peroxy radical-related deviations from the photo-stationary state relationship relating O<sub>3</sub>, NO, and and NO<sub>2</sub> concentrations. Uncertainties in the NO<sub>2</sub> measurement (calculated as NO<sub>x</sub>-NO) may also be a factor to consider.

Response – You are correct. We did not address this for the Leighton ratio, although we did address the potential bias in the NO<sub>x</sub>/NO<sub>2</sub> ratio from these errors. We have now addressed the potential bias in  $\phi$  but it does not change the interpretation. Clarifying text:

Section 3.3: *Even if we consider a potential bias of + 20% in the NO<sub>2</sub> measurements by the NO<sub>x</sub> analyzer for reasons outlined in Section 3.2 (highly unlikely in a fresh NO<sub>x</sub> plume), a + 20% bias in the Leighton ratio would still give ( $\phi = 1.4-1.9$ ).*

**Footnote in Table 3:** *\*Note that Leighton ratios,  $\phi$ , could be biased high by as much as +20% from the the NO<sub>2</sub> component of NO<sub>x</sub> measured by the NO<sub>x</sub> analyzer, but likely much lower due to it being a fresh urban/industrial NO<sub>x</sub> plume.*

Lines 423 and Line 570: fix "Canada and Canada" reference formatting errors

Response - Fixed, should be ECCC.

Line 656: please add a URL for this reference.

Response - Fixed.

Additional references:

Davis, Z. Y. W., Frieß, U., Strawbridge, K. B., Aggarwal, M., Baray, S., Schnitzler, E. G., Lobo, A., Fioletov, V. E., Abboud, I., McLinden, C. A., Whiteway, J., Willis, M. D., Lee, A. K. Y., Brook, J., Olfert, J., O'Brien, J., Staebler, R., Osthoff, H. D., Mihele, C., and McLaren, R.: Validation of MAX-DOAS retrievals of aerosol extinction, SO<sub>2</sub> and NO<sub>2</sub> through comparison with lidar, sun photometer, Active-DOAS and aircraft measurements in the Athabasca Oil Sands Region, Atmos. Meas. Tech. Discuss., <https://doi.org/10.5194/amt-2019-296>, in review, 2019.
